# Supplementary material
Source: publisher figshare collection journal article supplement (https://springernature.figshare.com/ndownloader/files/9993472)
Supplement: Supplementary file [file 9993472]

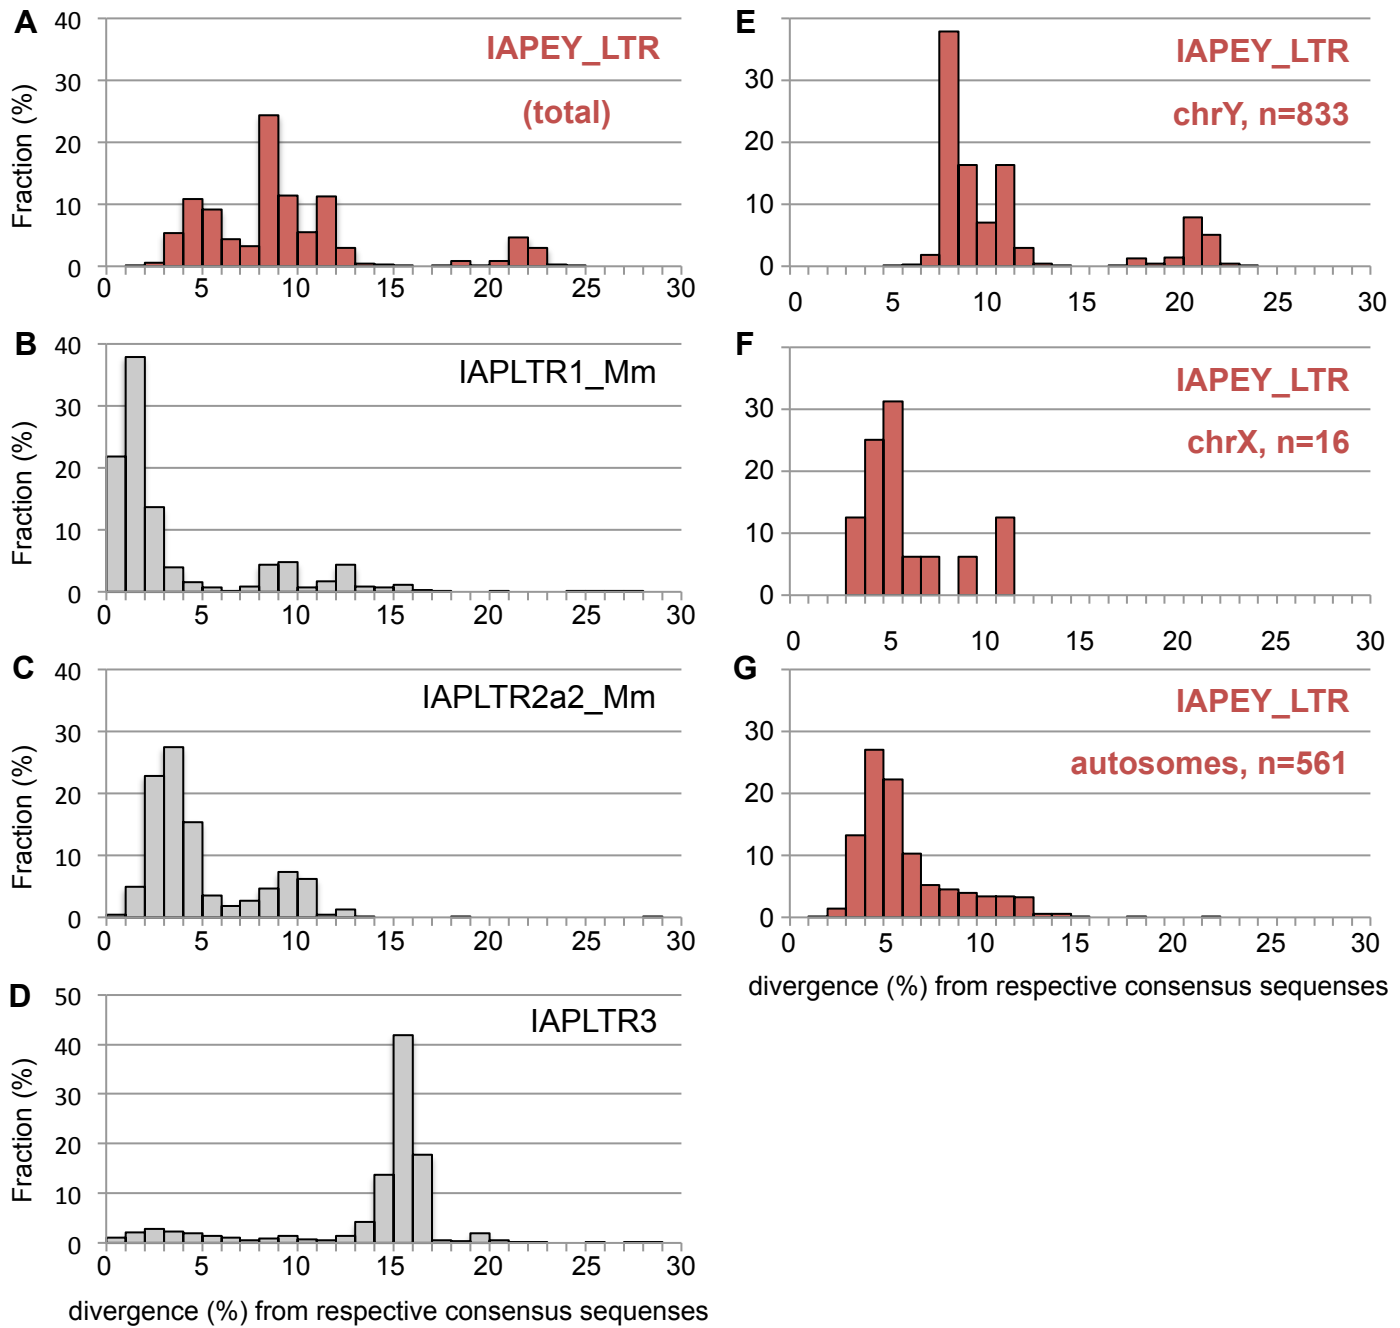

**Figure S1. Sequence divergence of IAPEY\_LTR genomic copies.**

Sequence divergence (%) from the respective consensus sequences for genomic copies of IAPEY\_LTR (A), IAPLTR1\_Mm (B), IAPLTR2a2\_Mm (c), and IAPLTR3 (D) are shown. For IAPEY\_LTR sequences, statistics were analyzed separately for Y-chromosomal (E), X-chromosomal (F), and autosomal (G) copies. Although IAPEY copies have been accumulated in the Y chromosome, these copies are more divergent from the consensus sequence than those in autosomes.
